# Supplementary material for: Two-photon absorption in a conformationally twisted D–π–A oligomer: a synergic photosensitizing approach for multiphoton lithography
Source: Royal Society of Chemistry journal article supplement (doi:10.1039/c4tc00841c), 2014-07-21
Supplement: c4tc00841c1.pdf [file c4tc00841c1.pdf]

## SUPPORTING INFORMATION FOR:

# Two-Photon Absorption in a Conformationally Twisted D- $\pi$ -A Oligomer : A Synergic Photosensitizing Approach for Multiphoton Lithography

Jean-Pierre Malval,<sup>\*a</sup> Sylvain Achelle,<sup>\*b</sup> Loic Bodiou,<sup>c</sup> Arnaud Spangenberg,<sup>a</sup> Laura Chia Gomez,<sup>a</sup> Olivier Soppera<sup>a</sup> and Françoise Robin-le Guen.<sup>b</sup>

<sup>a</sup> Institut de Science des Matériaux de Mulhouse, UMR CNRS 7361, Université de Haute-Alsace, 15 rue Jean Starcky, 68057 Mulhouse, France E-Mail : jean-pierre.malval@uha.fr; Tel : +33 (0)389 608 769

<sup>b</sup> Institut des Sciences Chimiques de Rennes UMR CNRS 6226, IUT de Lannion, rue Edouard Branly, BP 30219, F22302 Lannion Cedex, France E-Mail : sylvain.achelle@univ-rennes1.fr; Tel : +33 (0)296 469 448

<sup>c</sup> Université Européenne de Bretagne (UEB) CNRS, FOTON, UMR 6082, CCLO, ENSSAT BP80518, 22305 Lannion cedex, France

## CONTENTS

**Figure S1.**  $^1\text{H}$  500MHz NMR and  $^{13}\text{C}$  100MHz NMR spectra of **Og** in  $\text{CDCl}_3$

**Figure S2.** Powder XRD spectrum of oligomer **Og**

**Figure S3.** Normalized absorption and fluorescence spectra of **M** and **Og** in apolar medium (solvent : hexane).

**Figure S4.** Time fluorescence decays of the chromophores recorded at their respective  $\lambda_{\text{fluor}}^{\text{MAX}}$ ; instrumental response function (IRF). Residual graphs relative to single- or bi-exponential fits. (solvent : dichloromethane)

**Figure S5.** Stern-Volmer plots as observed by emission lifetimes in dichloromethane

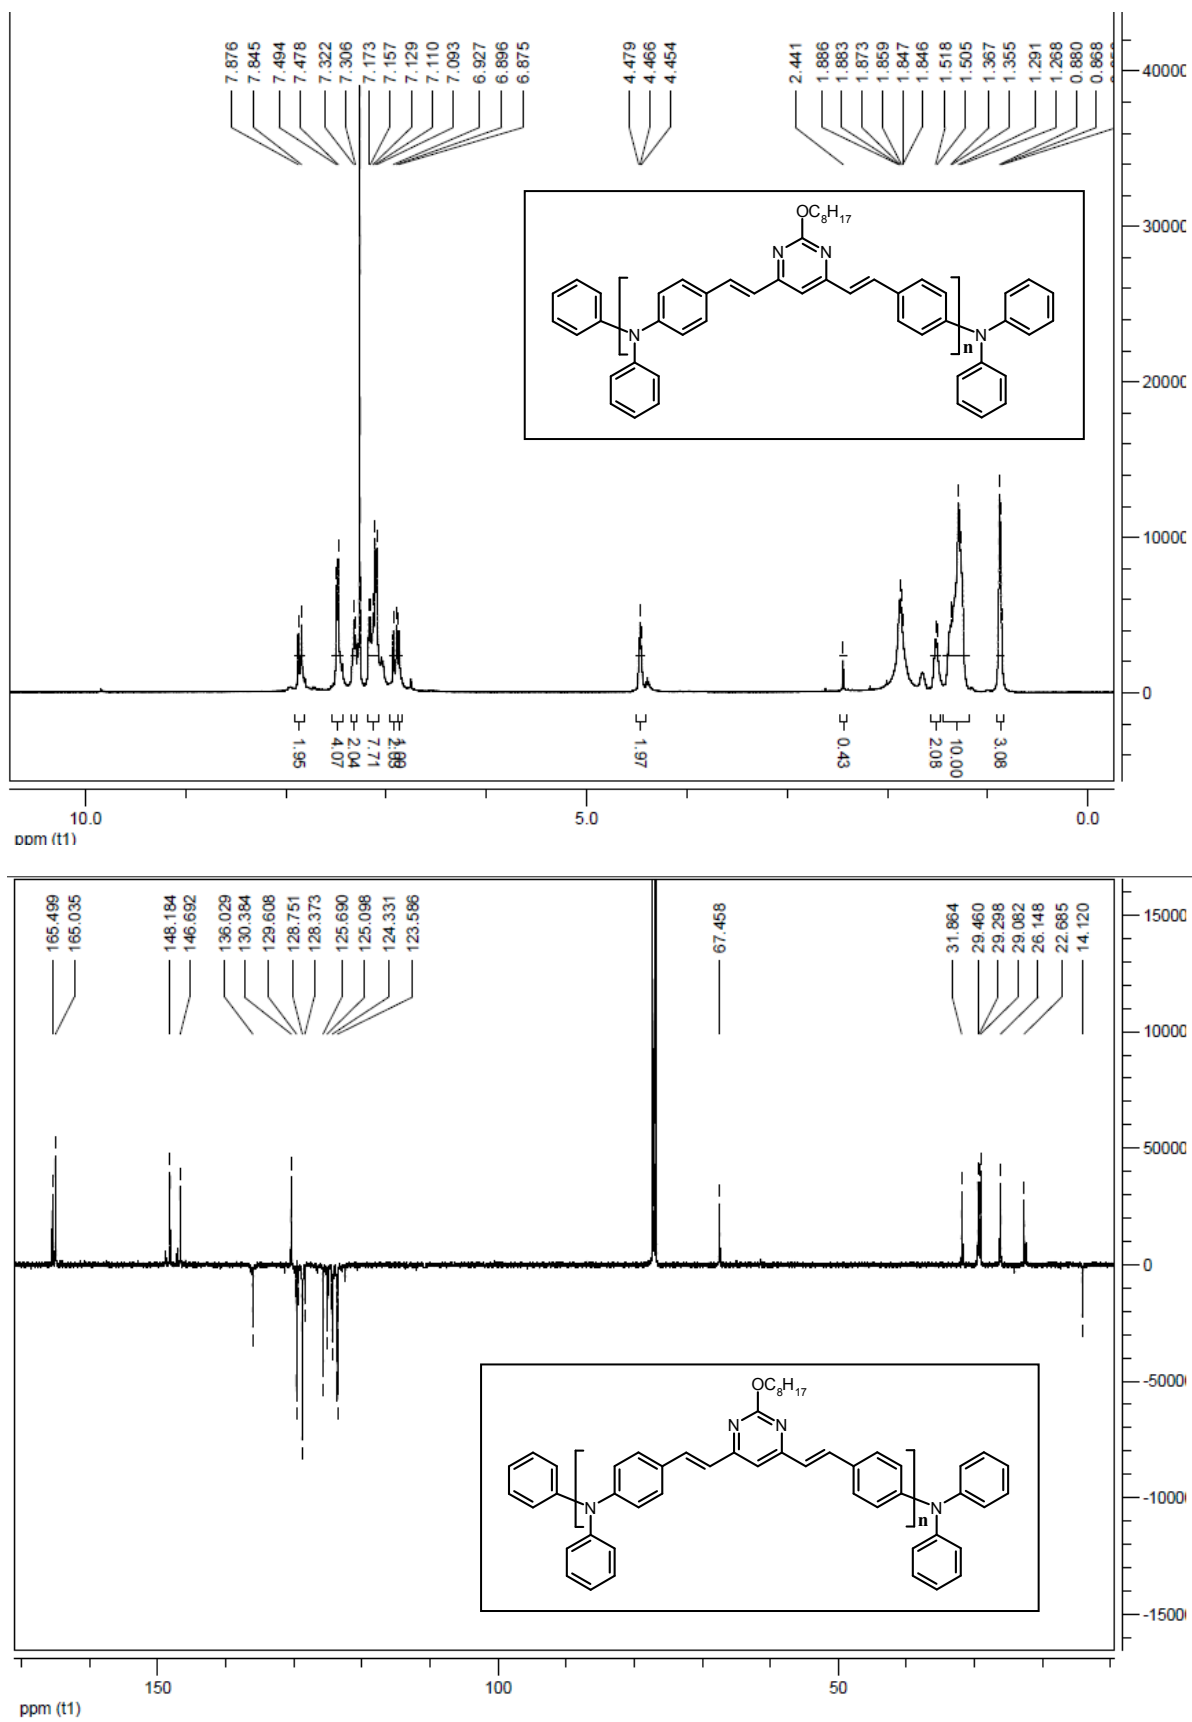

Figure S1.

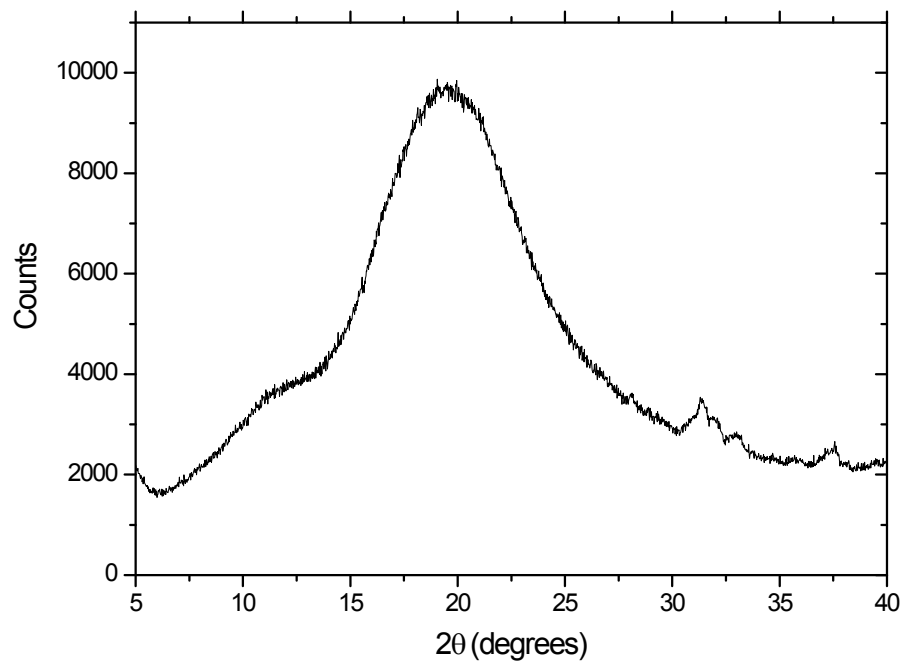

**Figure S2.**

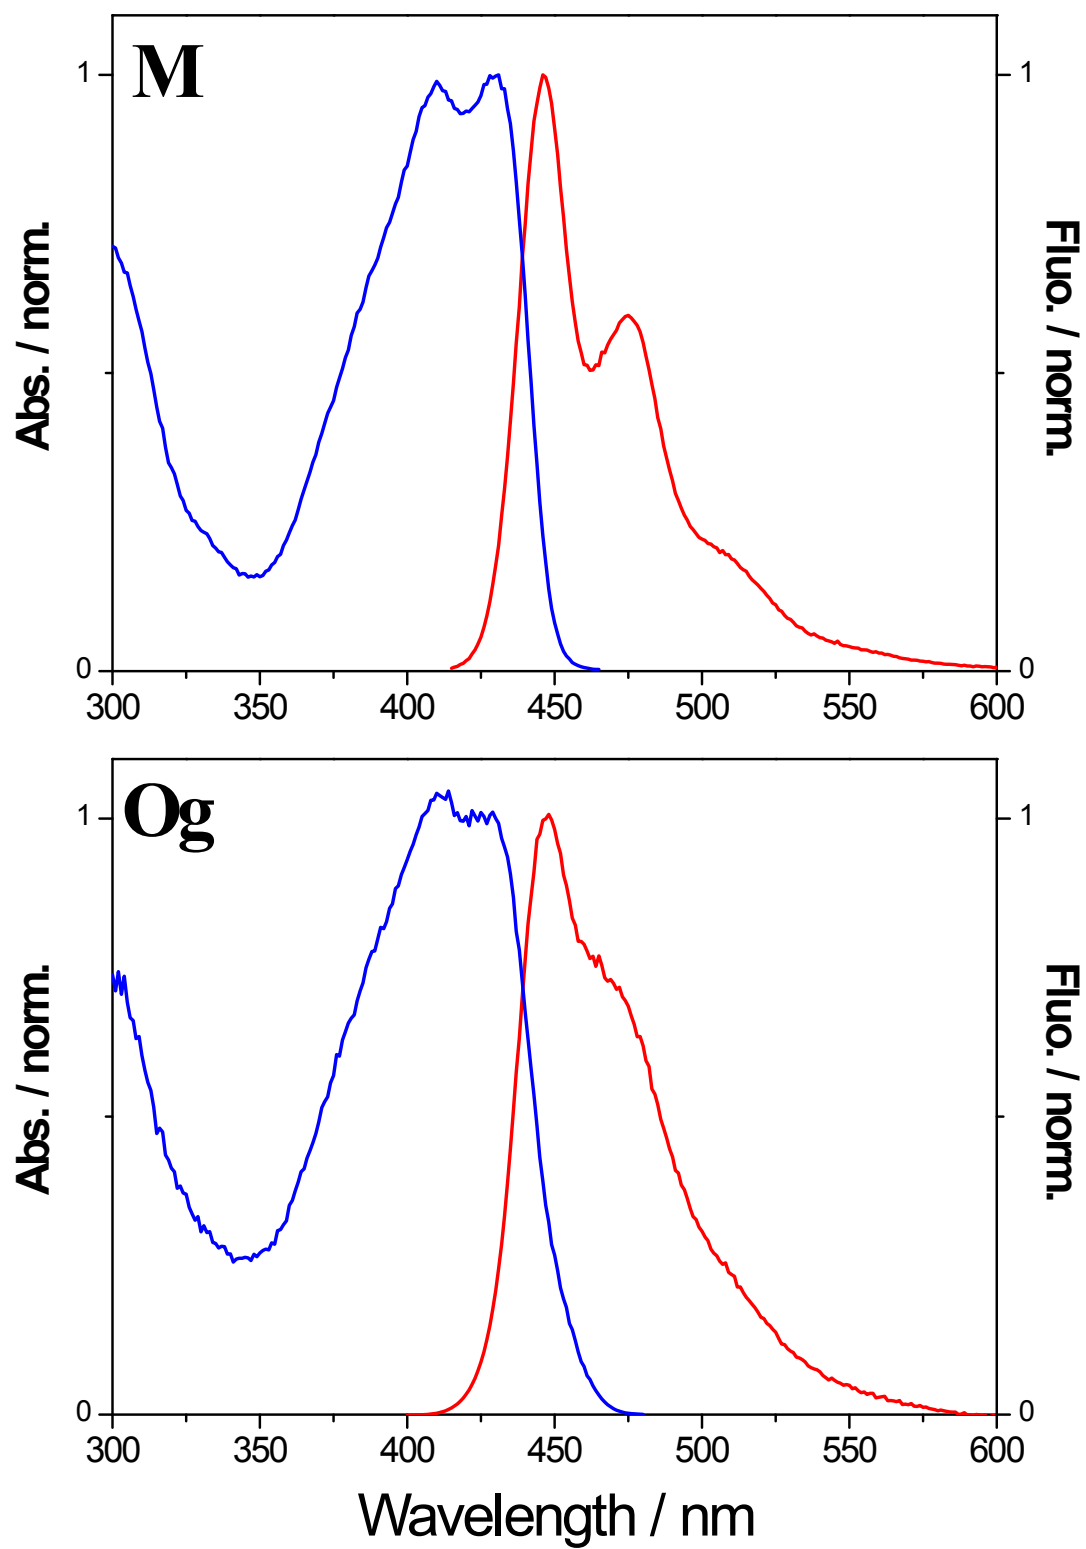

Figure S3.

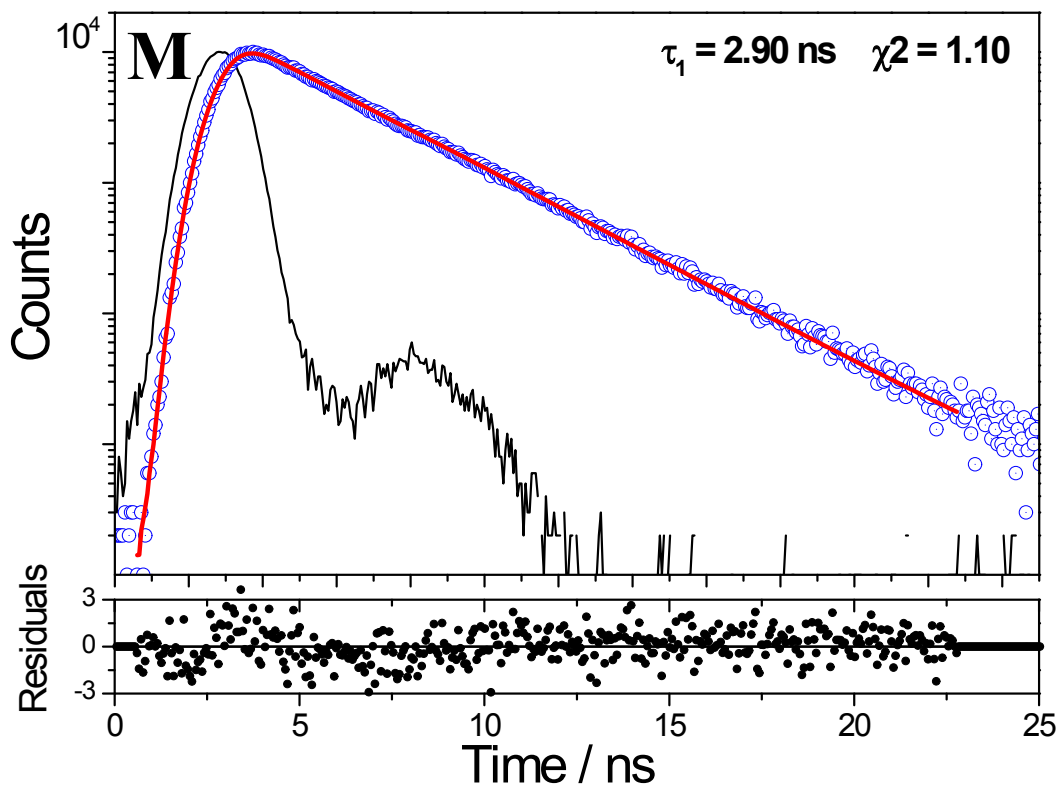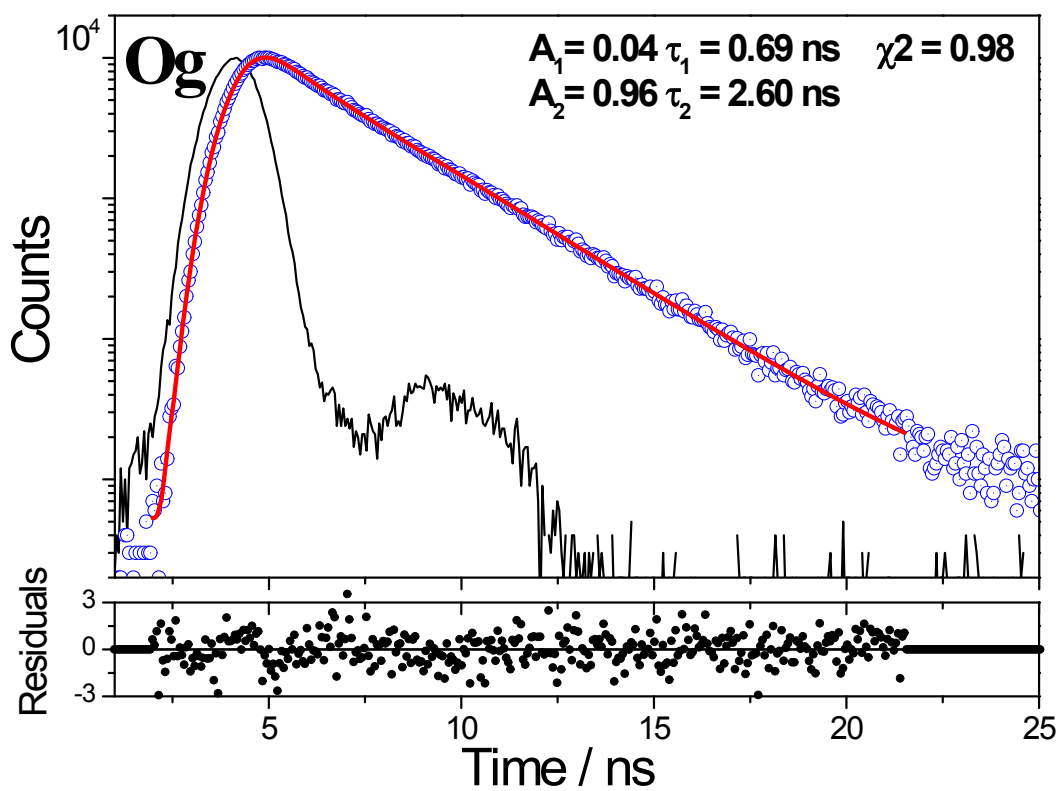

Figure S4.

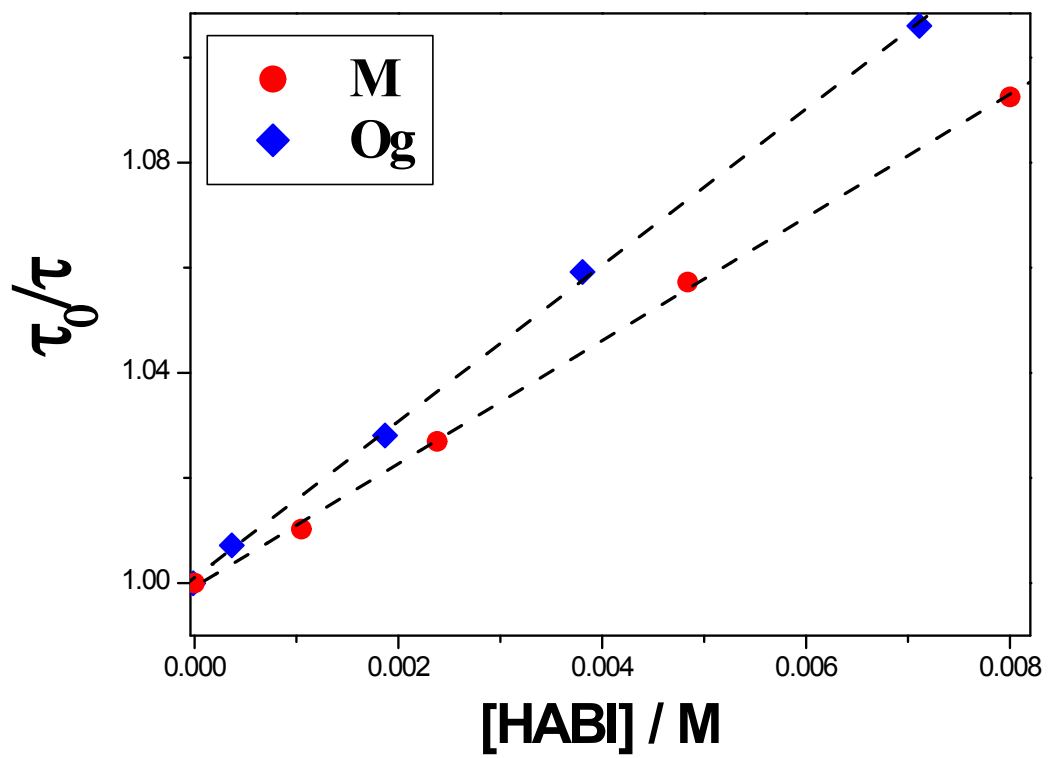

Figure S5.
